# Supplementary material
Source: Springer Nature journal article supplement (https://www.springermedizin.de/resource/supplementary/13020_2011_134_MOESM4_ESM.pdf/9641050)

A.

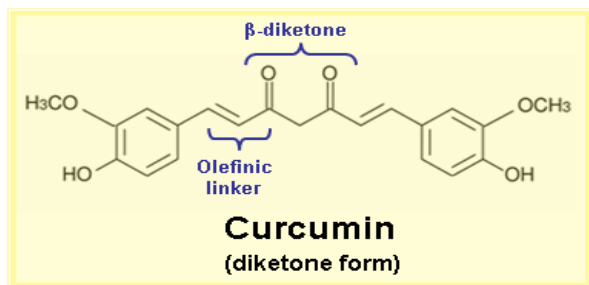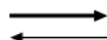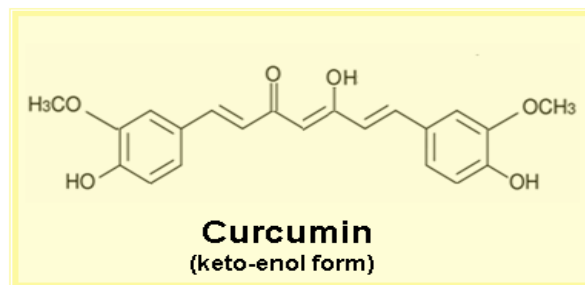

B.

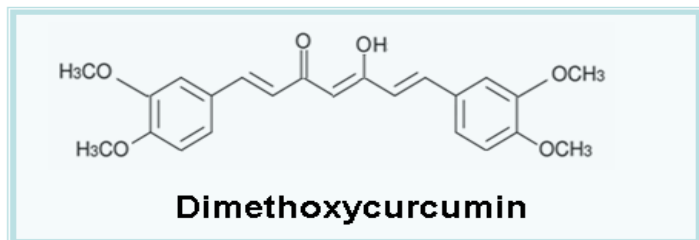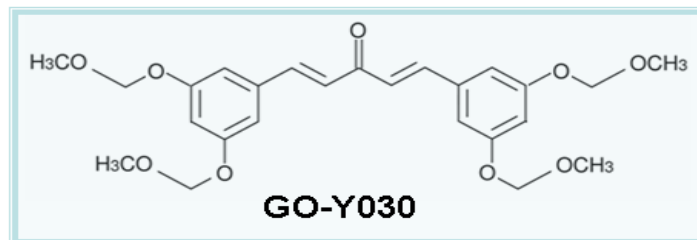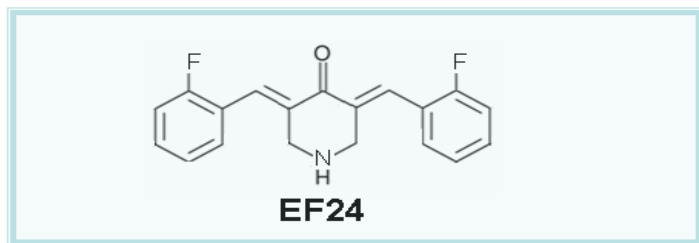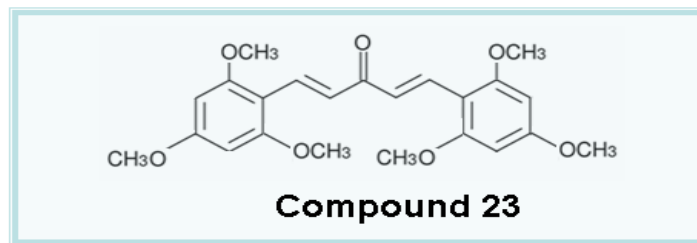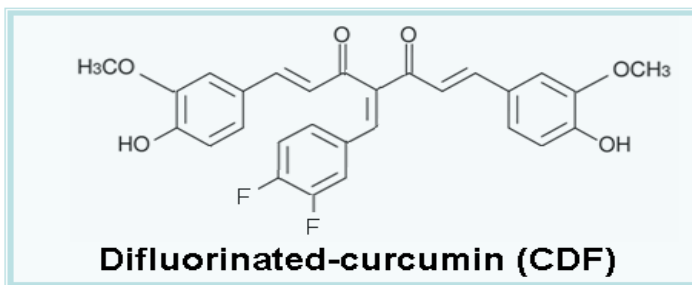

Supplement: MOESM4 [file 9641050]
